# Supplementary material for: Wafer-Scale Functional Circuits Based on Two Dimensional Semiconductors with Fabrication Optimized by Machine Learning
Source: Research Square preprint supplement (doi:10.21203/rs.3.rs-152918/v1), 2021-01-27
Supplement: Supplementary file 1 [file e496457eeab71b476834b311.pdf]

# Wafer-Scale Functional Circuits Based on Two Dimensional Semiconductors with Fabrication Optimized by Machine Learning

Xinyu Chen<sup>†1</sup>, Yaochen Sheng<sup>†1</sup>, Yufeng Xie<sup>†1</sup>, Hongwei Tang<sup>†1</sup>, Zeming Wang<sup>1</sup>, Yu Wang<sup>1</sup>, Yin Wang<sup>1</sup>, Fuyou Liao<sup>1</sup>, Jingyi Ma<sup>1</sup>, Xiaojiao Guo<sup>1</sup>, Ling Tong<sup>1</sup>, Hanqi Liu<sup>1</sup>, Hao Liu<sup>1</sup>, Tianxiang Wu<sup>1</sup>, Jiaxin Cao<sup>1</sup>, Sitong Bu<sup>1</sup>, Hui Shen<sup>1</sup>, Fuyu Bai<sup>1</sup>, Daming Huang<sup>1</sup>, Jianan Deng<sup>2</sup>, Antoine Riaud<sup>1</sup>, Zihan Xu<sup>3</sup>, Chenjian Wu<sup>4</sup>, Shiwei Xing<sup>4</sup>, Ye Lu<sup>2</sup>, Shunli Ma<sup>1</sup>, Zhengzong Sun<sup>1</sup>, Zhongyin Xue<sup>5</sup>, Zengfeng Di<sup>5</sup>, Xiao Gong<sup>6</sup>, Peng Zhou<sup>\*1</sup>, Jing Wan<sup>\*2</sup>, and Wenzhong Bao<sup>\*1</sup> and David Wei Zhang<sup>1</sup>.

<sup>1</sup> State Key Laboratory of ASIC and System, School of Microelectronics, Fudan University, Shanghai 200433, P. R. China.

<sup>2</sup> State Key Laboratory of ASIC and System, School of Information Science and Technology, Fudan University, Shanghai 200433, P. R. China.

<sup>3</sup> Shenzhen Six Carbon Technology, Shenzhen 518055, P. R. China.

<sup>4</sup> School of Electronic and Information Engineering, Soochow University, Suzhou 215006, P. R. China.

<sup>5</sup> State Key Laboratory of Functional Materials for Informatics, Shanghai Institute of Microsystem and Information Technology, Chinese Academy of Sciences, 865 Changning Road, Shanghai, 200050, China

<sup>6</sup> Department of Electrical and Computer Engineering, National University of Singapore, Singapore 117583, Singapore.

\*Correspondence to [pengzhou@fudan.edu.cn](mailto:pengzhou@fudan.edu.cn); [jingwan@fudan.edu.cn](mailto:jingwan@fudan.edu.cn); [baowz@fudan.edu.cn](mailto:baowz@fudan.edu.cn).

† These authors contribute to this work equally.

## Table of Contents

|                                                                                                                                       |           |
|---------------------------------------------------------------------------------------------------------------------------------------|-----------|
| <b>1. Materials and Methods.....</b>                                                                                                  | <b>3</b>  |
| <b>2. Raman spectra and mapping of wafer-scale MoS<sub>2</sub> films.....</b>                                                         | <b>4</b>  |
| <b>3. The supervised ML method used in this work .....</b>                                                                            | <b>5</b>  |
| <b>4. Detailed processing steps for fabricating MoS<sub>2</sub> FETs .....</b>                                                        | <b>7</b>  |
| <b>5. Impact of contact electrode on the transfer characteristics for top-gated MoS<sub>2</sub> FETs .....</b>                        | <b>8</b>  |
| <b>6. Impact of seeding layer on the transfer characteristics for top-gated MoS<sub>2</sub> FETs .....</b>                            | <b>10</b> |
| <b>7. Transfer characteristics for top-gated MoS<sub>2</sub> FETs with and without annealing after seeding layer deposition .....</b> | <b>11</b> |
| <b>8. Impact of TG electrodes on the transfer characteristics for top-gated MoS<sub>2</sub> FETs .....</b>                            | <b>12</b> |
| <b>9. Comparison of device uniformity for top-gated MoS<sub>2</sub> .....</b>                                                         | <b>13</b> |
| <b>11. Analysis of inverters with different pull-up transistors .....</b>                                                             | <b>16</b> |
| <b>12. Analog amplifier composed of an inverter based on MoS<sub>2</sub> FET .....</b>                                                | <b>17</b> |
| <b>13. Measurement results of various basic logic circuit units .....</b>                                                             | <b>18</b> |
| <b>14. Schematic diagram of DRAM testing setup .....</b>                                                                              | <b>19</b> |
| <b>15. Photoelectric characteristics for top-gated MoS<sub>2</sub> FETs .....</b>                                                     | <b>20</b> |
| <b>16. Comparison with recently published works .....</b>                                                                             | <b>22</b> |

## 1. Materials and Methods

### a. Synthesis of wafer-scale MoS<sub>2</sub>

A crucible with MoO<sub>3</sub> power (Alfa Aesar 99.95%) is placed in Zone 2, and an appropriate amount of sulfur powder (Alfa Aesar 99.999%) is placed in Zone 1, which is upstream of the flow in the tube. The distance between the two zones is 30 cm. A carefully rinsed sapphire substrate is placed face-down on the MoO<sub>3</sub> power. During the synthesis process, 300 sccm argon gas serves as a carrier gas. The synthesis temperature for Zone 1 and Zone 2 is controlled at 180 and 650 °C, respectively. Continuous monolayer MoS<sub>2</sub> film is synthesized at atmospheric pressure with a 10 min sulfuration time.

### b. Fabrication process of MoS<sub>2</sub> FETs and circuits

The MoS<sub>2</sub> FETs and circuits are fabricated on the wafer-scale MoS<sub>2</sub> film on the sapphire substrate. The contact electrodes, source and drain contacts, are patterned by laser direct writing technology (Micro-Writer ML3) and subsequently deposited using Electronic Beam (E-beam) evaporation. CF<sub>4</sub> plasma etching is performed to define the MoS<sub>2</sub> channel region. A SiO<sub>2</sub> seeding layer is deposited by E-beam evaporation and subsequently annealed in an oxygen atmosphere at 100 °C. Then HfO<sub>2</sub> is then grown by Atom Layer Deposition (ALD) as the FET dielectric layer. Another lithography/lift-off/deposition process is repeated to form the top metal layer. For electrical probing or further fabrication of more complex circuits, SF<sub>6</sub> plasma etching is used to remove the HfO<sub>2</sub> layer on top of the source/drain electrodes to form via holes defined by the lithography.

### c. Electrical measurement

The electrical properties of MoS<sub>2</sub> FETs and circuits are carried out in a probe station connecting to an Agilent B1500A semiconductor analyzer with eight source measure units (SMUs). To investigate the circuit's dynamic response, an *Agilent 33622A* arbitrary waveform generator is used to input signals while a *RIGOL DS1054Z* digital oscilloscope captures the output voltage.

## 2. Raman spectra and mapping of wafer-scale MoS<sub>2</sub> films

Raman spectra from 1800 locations were measured in 3 regions (a, b, and c in Fig. S1d) of the as-synthesized films (insets in Fig. S1a-c). The Raman spectra have nearly identical shapes and intensities, revealing large-area uniformity in the synthesized monolayer MoS<sub>2</sub> film. Raman mapping at the  $E_{2g}^1$  peak ( $384.4\text{ cm}^{-1}$ ) was also performed to build a 2D color plot in a square region ( $120\times120\text{ }\mu\text{m}^2$ ) at various positions (a, b, and c in Fig. S1d) on the wafer. These results show that the synthesis method used in this paper can effectively grow wafer-level, crystal-like, uniform MoS<sub>2</sub> monolayers with a variety of potential applications.

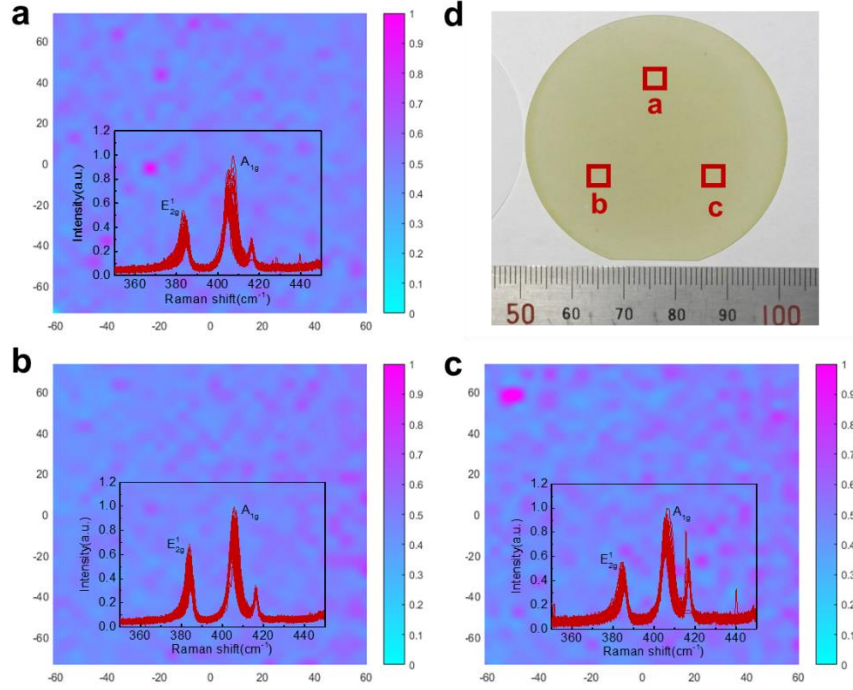

**Fig. S1.** Raman intensity maps normalized by the highest intensity at the  $E_{2g}^1$  peak ( $384.4\text{ cm}^{-1}$ ) in wafer-scale monolayer MoS<sub>2</sub> grown on a sapphire substrate, where the scanning area is  $120\times120\text{ }\mu\text{m}^2$ . The wavelength of the Raman laser is 514 nm. The insets in Fig. S1 a-c show normalized Raman spectra from 1800 different locations in the scan area. d, Optical images of wafer-scale monolayer MoS<sub>2</sub>, in which the three red squares (a, b, and c) indicate the scanning areas in Fig. S1 a-c, respectively.

### 3. The supervised ML method used in this work

#### a. Description of ensemble learning:

Because the semiconductor manufacturing process cannot guarantee similar data types in each step, we choose the Random-Under-Sampling (RUSBoost) algorithm and the decision tree as the weak classifier because they can efficiently handle discrete data, and RUSBoost is especially effective at classifying imbalanced data.

The RUS algorithm takes  $N$ , the number of members in the class with the fewest members in the training data, as the basic unit for sampling. Classes with more members are sampled by taking only  $N$  observations of every class. After training the RUSBoost classifier, we can find the best semiconductor manufacturing recipe combination through a grid search method. Grid search is extensively used in the field of discrete parameters.

#### B .Description of Radom forest algorithm

Random forest is an integrated learning algorithm based on decision tree learners, which is widely used and easy to implement <sup>1,2</sup>. The random forest algorithm can be summarized as follows:

- 1) The bootstrap method is used to select  $n$  samples from the sample set as a training set.
- 2) A decision tree is generated from the sample set. Multiple features  $X_j$  are randomly selected at each generated node  $m$  without repetition. Then they are used to divide the sample set until finding the best division feature.
- 3) Step 1 and step 2 are repeated  $k$  times, where  $k$  is the number of decision trees in the random forest.
- 4) The trained random forest is used to predict the test sample, while the voting method is used to determine the prediction result.

#### c. Feature importance assessment

Importance evaluation is used to see how much each feature contributes to each tree in the random forest. The Gini index was used for evaluation, which is defined as follows:

$$Gini(p) = \sum_{k=1}^k p_k(1 - p_k) = 1 - \sum_{k=1}^k p_k^2$$

where  $k$  is the number of categories and  $p_k$  is the weight of category  $k$ .

For feature  $X_j$  at node  $m$  in the Gini index, the difference before and after the branch generation of node  $m$  is defined as:

$$VIM_{jm}^{(Gini)} = GI_m - GI_l - GI_r$$

where  $GI_l$  and  $GI_r$  represent the Gini indices of two new nodes after the branch, respectively.

For feature  $X_j$  that appears in decision tree  $i$ , if the node is in set  $M$ , then the importance of  $X_j$  in decision tree  $i$  is:

$$VIM_{ij}^{(Gini)} = \sum_{m \in M} VIM_{jm}^{(Gini)}$$

If there are  $n$  trees in the random forest, then

$$VIM_j^{(Gini)} = \sum_{i=1}^n VIM_{ij}^{(Gini)}$$

Finally, all the obtained importance scores are normalized:

$$VIM_j = \frac{VIM_j}{\sum_{i=1}^c VIM_i}$$

where the denominator is the sum of all features' importance scores, and the numerator is the Gini index of feature  $j$ .

In this work, the evaluation index of each sample in the data set is calculated by the scores of mobility, threshold voltage ( $V_T$ ), subthreshold swing ( $SS$ ) and hysteresis with weights of 30%, 30%, 20% and 20% respectively (the percentage values can be adjusted according to devices with different functionalities, e.g. mobility is more important for faster speed and  $SS$  for low power consumption). Then the random forest algorithm is used to predict the scores of all possible processing combinations.

#### 4. Detailed processing steps for fabricating MoS<sub>2</sub> FETs

Table S1 shows detailed MoS<sub>2</sub> FET processing steps used for machine learning in Fig. 2c in the main text. Steps filled with color are marked in Fig. 2c in the maintext, where device performance (threshold voltage or mobility) is more sensitive to changes in these parameters. In the following session 4–9, we discuss the optimization of these steps.

**Table S1.**  
Detailed processing steps for machine learning.

| Step Number | Detailed Process                    | Step Number | Detailed Process                          |
|-------------|-------------------------------------|-------------|-------------------------------------------|
| 1           | Quality of MoS <sub>2</sub> film    | 26          | Deposition rate 2 of contact              |
| 2           | 1 <sup>st</sup> Photoresist coating | 27          | 3 <sup>rd</sup> Peeling temperature       |
| 3           | 1 <sup>st</sup> Baking temperature  | 28          | 3 <sup>rd</sup> Peeling time              |
| 4           | 1 <sup>st</sup> Baking time         | 29          | Annealing machine of contact              |
| 5           | 1 <sup>st</sup> Spinning speed      | 30          | Annealing gas of contact                  |
| 6           | 2 <sup>nd</sup> Photoresist coating | 31          | Annealing temperature of contact          |
| 7           | 2 <sup>nd</sup> Baking temperature  | 32          | Annealing time of contact                 |
| 8           | 2 <sup>nd</sup> Baking time         | 33          | Annealing machine of seeding layer        |
| 9           | 2 <sup>nd</sup> Spinning speed      | 34          | Annealing time of seeding layer           |
| 10          | 2 <sup>nd</sup> Exposure dose       | 35          | Annealing temperature of seeding layer    |
| 11          | 2 <sup>nd</sup> Developing time     | 36          | Annealing gas of seeding layer            |
| 12          | Etching gas                         | 37          | Seeding layer                             |
| 13          | Etching time                        | 38          | Temperature of the main dielectric growth |
| 14          | Etching power                       | 39          | Thickness of the main dielectric          |
| 15          | Vacuum level of etching             | 40          | Materials of top gate                     |
| 16          | 2 <sup>nd</sup> Peeling temperature | 41          | Deposition method of top gate             |
| 17          | 2 <sup>nd</sup> Peeling time        | 42          | Vacuum level of top gate deposition       |
| 18          | 3 <sup>rd</sup> Photoresist coating | 43          | Deposition rate 1 of top gate             |
| 19          | 3 <sup>rd</sup> Baking temperature  | 44          | Deposition rate 2 of top gate             |
| 20          | 3 <sup>rd</sup> Baking time         | 45          | 4 <sup>th</sup> Photoresist coating       |
| 21          | 3 <sup>rd</sup> Spinning speed      | 46          | 4 <sup>th</sup> Baking temperature        |
| 22          | Deposition method of contact        | 47          | 4 <sup>th</sup> Baking time               |
| 23          | Vacuum level of contact deposition  | 48          | 4 <sup>th</sup> Spinning speed            |
| 24          | Contact materials                   | 49          | 4 <sup>th</sup> Peeling temperature       |
| 25          | Deposition rate 1 of contact        | 50          | 4 <sup>th</sup> Peeling time              |

## 5. Impact of contact electrode on the transfer characteristics for top-gated MoS<sub>2</sub> FETs

Regarding the contact between MoS<sub>2</sub> and the metal electrode, there are two aspects that affect the contact resistance: 1) the tunneling barrier between the metal and MoS<sub>2</sub> below the metal contact because of the van der Waals (vdW) gap and, 2) the Schottky barrier between the MoS<sub>2</sub> channel and the metal electrodes. In order to compare the influence of different metal contacts on device electrical performance, four types of electrodes (Ti/Au, Au, In/Au and Ag/Au) were deposited as source and drain electrodes (Fig. S2). The results show that in this comparison group, *the devices with Au or Ti/Au electrodes exhibit larger on-state current, which is indicative of a better contact*. The fabrication recipes are shown in Table S2.

**Table S2.** Comparison group in which the S/D contact material is a variable and other parameter are kept the same.

| Process | S/D   | Seeding layer         | Anneal of SL | Material of TG |
|---------|-------|-----------------------|--------------|----------------|
| a       | Ti/Au | 2 nm SiO <sub>2</sub> | w/o          | Au             |
| b       | Au    | 2 nm SiO <sub>2</sub> | w/o          | Au             |
| c       | In/Au | 2 nm SiO <sub>2</sub> | w/o          | Au             |
| d       | Ag/Au | 2 nm SiO <sub>2</sub> | w/o          | Au             |

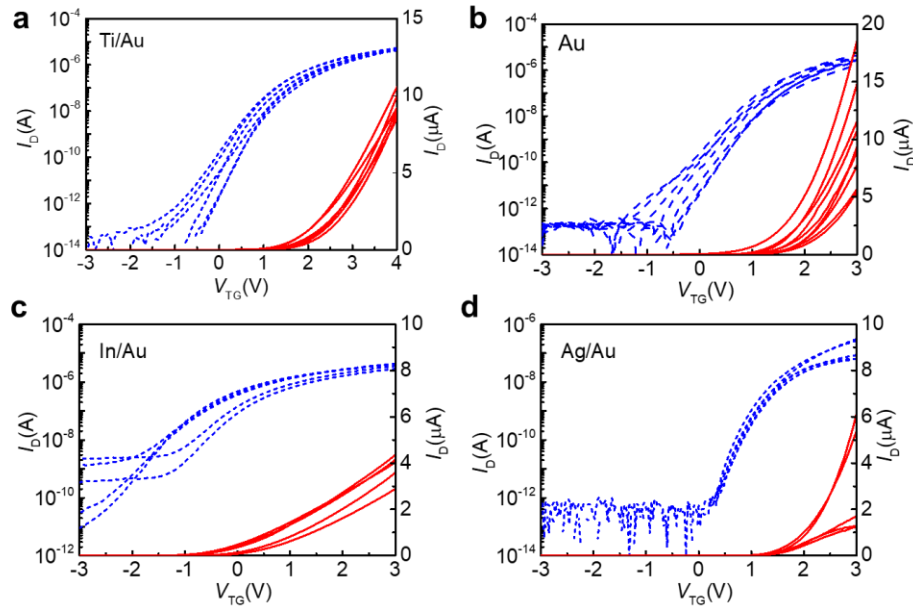

**Fig. S2.**  $I_D$ - $V_{TG}$  curves of top-gated CVD MoS<sub>2</sub> FETs on wafer-scale substrate with **a**, Ti/Au, **b**, Au, **c**, In/Au, and **d**, Ag/Au contacts at  $V_{DS} = 0.1$  V. Blue and red curves correspond to the logarithmic scale on the left and linear scale on the right y-axis, respectively.



In this group of comparison experiments, we further compare the performance of top-gated MoS<sub>2</sub> FETs with different contact electrodes. The contact resistant  $R_c$  extracted using the Y-function method is plotted with error bars for different contact electrodes shown in Fig. S3. Based on these statistical results, we can again conclude that *Au and Ti/Au contact electrodes provide lower contact resistant than that from other electrodes.*

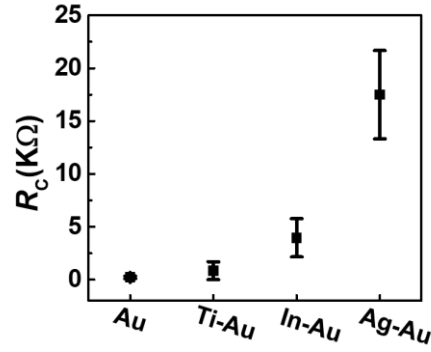

**Fig. S3.** Extracted contact resistance between MoS<sub>2</sub> and different metals using Y-function fitting to transfer curves.

## 6. Impact of seeding layer on the transfer characteristics for top-gated MoS<sub>2</sub> FETs

In this group of comparison experiments, we tested different various seeding layers (SLs), and found that both 2-nm-thick SiO<sub>2</sub> and Al<sub>2</sub>O<sub>3</sub> are favorable SL materials for FETs to achieve positive  $V_T$  and the large on-state current. The fabrication recipes and transfer characteristics for top-gated MoS<sub>2</sub> FETs are shown in Table S3 and Fig. S4.

**Table S3.** Comparison group in which the SL material is a variable and other parameter are kept the same.

| Process | S/D | Seeding layer                       | Anneal of SL | Material of TG |
|---------|-----|-------------------------------------|--------------|----------------|
| a       | Au  | N/A                                 | w/o          | Au             |
| b       | Au  | 2 nm Y <sub>2</sub> O <sub>3</sub>  | w/o          | Au             |
| c       | Au  | 2 nm Al <sub>2</sub> O <sub>3</sub> | w/o          | Au             |
| d       | Au  | 2 nm SiO <sub>2</sub>               | w/o          | Au             |

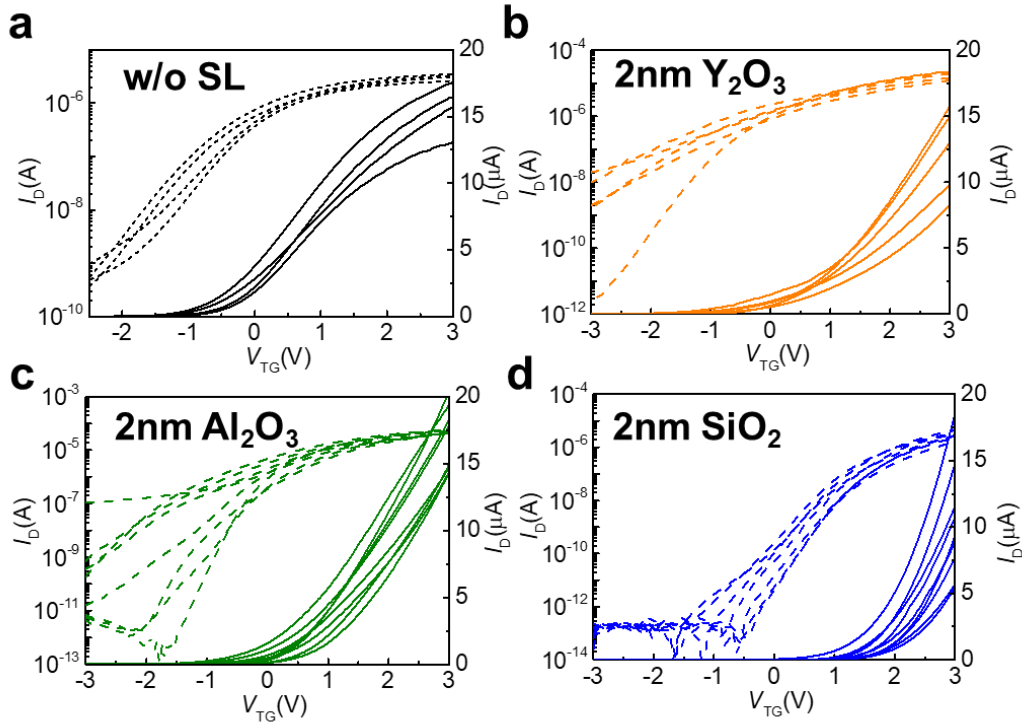

**Fig. S4.** a-d,  $I_D$ - $V_{TG}$  curves of top-gated CVD MoS<sub>2</sub> FETs on wafer-scale substrate with different processes (a-d in Table S3) at  $V_{DS} = 0.1$  V.

## 7. Transfer characteristics for top-gated MoS<sub>2</sub> FETs with and without annealing after seeding layer deposition

In order to improve the electrical characteristics of MoS<sub>2</sub> FETs, we annealed the devices at 100 °C in nitrogen for 30 min after deposition of a seed layer. Compared with unannealed devices,  $V_T$  is more positive and steeper subthreshold (SS) is obtained after annealing, most likely due to the improvement of interface between MoS<sub>2</sub> and seed layer, as well as reduction of defects and dipoles in the channel and contact region. The fabrication recipes and transfer characteristics for top-gated MoS<sub>2</sub> FETs are shown in Table S4 and Fig. S5.

**Table S4.** Comparison group in which the SL annealing is a variable and other parameter are kept the same.

| Recipe | S/D | Seeding layer         | Anneal of SL | Material of TG |
|--------|-----|-----------------------|--------------|----------------|
| a      | Au  | 2 nm SiO <sub>2</sub> | w/o          | Au             |
| b      | Au  | 2 nm SiO <sub>2</sub> | w/           | Au             |

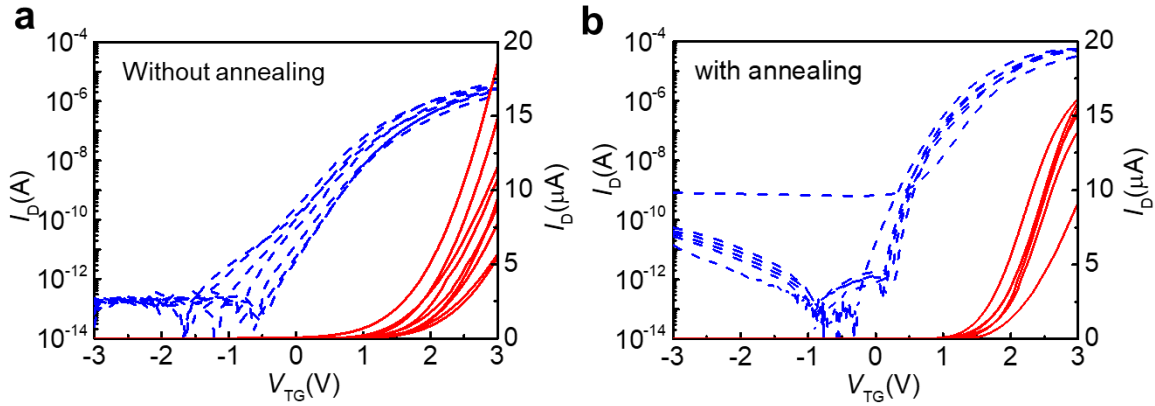

**Fig. S5.**  $I_D$ - $V_{TG}$  curves of the top-gated CVD MoS<sub>2</sub> FETs on a wafer-scale substrate with an **a**, unannealed and **b**, annealed seed layer at  $V_{DS} = 0.1$  V.

## 8. Impact of TG electrodes on the transfer characteristics for top-gated MoS<sub>2</sub> FETs

Au and Al were deposited to fabricate the top gate of the MoS<sub>2</sub> FETs. The work function of these metals is used to tune the threshold voltage  $V_T$  of the devices. The experimental results indicate that an *Au TG is more desirable for fabricating enhanced-mode FETs* due to its larger work function. The fabrication recipes and transfer characteristics for top-gated MoS<sub>2</sub> FETs are shown in Table S5 and Fig. S6.

**Table S5.** Comparison group in which the material of TG is a variable here and other parameters are kept the same.

| Recipe | S/D | Seeding layer         | Anneal of SL | Material of TG |
|--------|-----|-----------------------|--------------|----------------|
| a      | Au  | 2 nm SiO <sub>2</sub> | w/           | Au             |
| b      | Au  | 2 nm SiO <sub>2</sub> | w/           | Al             |

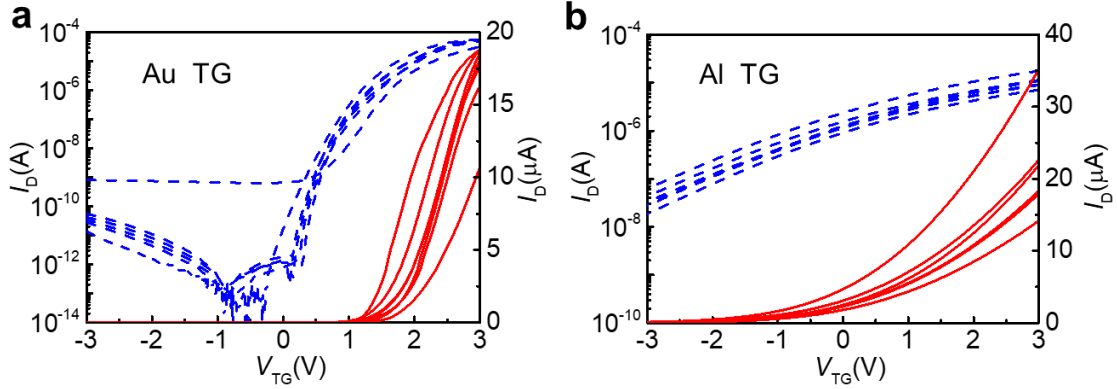

**Fig. S6.**  $I_D$ - $V_{TG}$  curves of top-gated MoS<sub>2</sub> FETs with **a**, Au TG and **b**, Al TG at  $V_{DS} = 0.1$  V.

## 9. Comparison of device uniformity for top-gated MoS<sub>2</sub>

To ensure a wafer-scale homogeneity of device performance, several top-gated MoS<sub>2</sub> FETs arrays were fabricated with different fabrication procedure combinations. Fig. S7a-c shows more than 100 transfer curves from device arrays prepared through three different process combinations (*a*, *b*, and *c* in Table S6). Fig. S7c is the same as Fig. 2g in the main text and presented here for a straightforward comparison. Other than the four processing steps shown in Table S6, all other steps are kept the same for comparison.

The results show that top gated MoS<sub>2</sub> FETs fabricated by combination *c* exhibit positive  $V_T$ , large ON-state current and high uniformity, which is the best result for further circuit fabrication. *It is noteworthy that combination c is not simply a combination of all best choices in each processing step from Sections 4–8.*

This confirms that our ML method for fabrication optimization indeed works since the evaluation score (Fig. 2e) of recipe *a* and *b* are lower than that of *c*, by considering more comparison test results not listed in this SI.

**Table S6.** Comparison group with 3 different recipe combinations.

| Process combination | S/D   | Seed layer                          | Anneal of SL | Material of TG |
|---------------------|-------|-------------------------------------|--------------|----------------|
| <i>a</i>            | Au    | 2 nm Al <sub>2</sub> O <sub>3</sub> | W/           | Au             |
| <i>b</i>            | Au    | 2 nm SiO <sub>2</sub>               | W/           | Au             |
| <i>c</i>            | Ti/Au | 2 nm SiO <sub>2</sub>               | W/           | Au             |

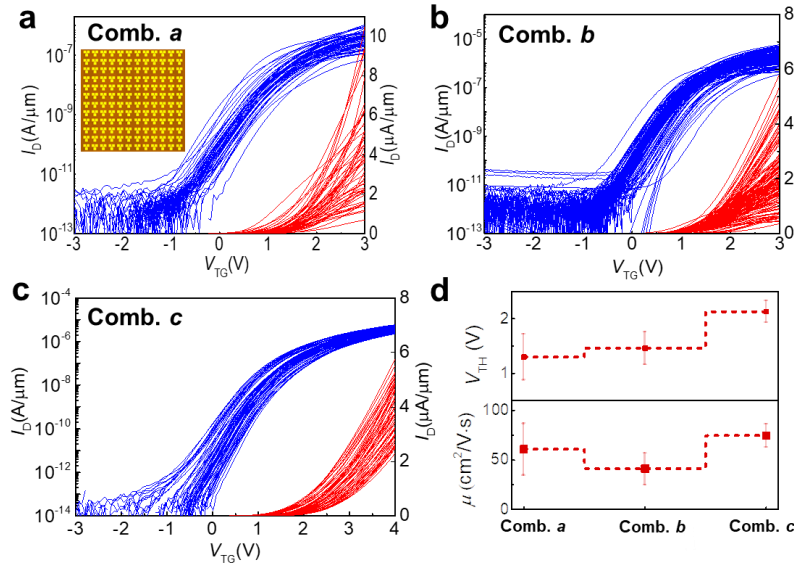

**Fig. S7.** a-c,  $I_D$ - $V_{TG}$  curves of top-gated CVD MoS<sub>2</sub> FETs array on wafer-scale substrates in different batches (a-c in Table S6) at  $V_{DS} = 0.5$  V. d, The extracted threshold voltage and mobility with error bar of device arrays prepared through various recipes a-c.

## 10. Low frequency 1/f noise in top-gated MoS<sub>2</sub> FETs

Low frequency noise measurements were gathered with a semiconductor parameter analyzer (Agilent 4156C), current amplifier (Stanford SR570), and spectrum analyzer (Agilent 35670A) in a manual probe station (Cascade). A schematic diagram of the measurement setup is shown in Fig. S8.

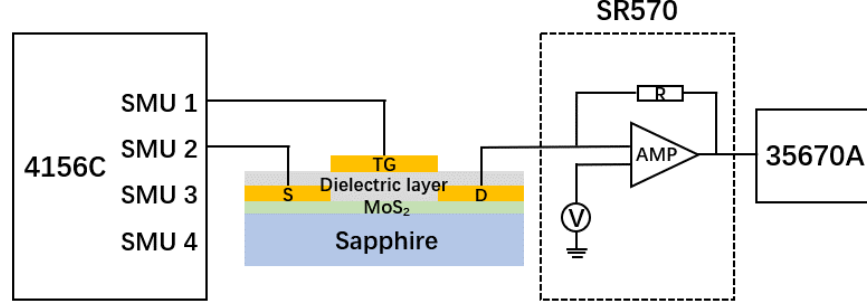

**Fig. S8.** Schematic diagram of reliability testing equipment of top-gated MoS<sub>2</sub> FET.

In a working FET, the current fluctuates within a small range due to electrical noise. It is generally represented by power spectral density, i.e., noise power per unit frequency.

Border traps can exchange charge with the channel through carrier capture or emission by tunneling when the gate voltage is swept. The border trap density can be further extracted from the low-frequency noise in the transistor, as shown in Fig. S9. Here, the noise power spectra normalized against the drain current  $I_D$  are extracted, as shown in Fig. S9a.

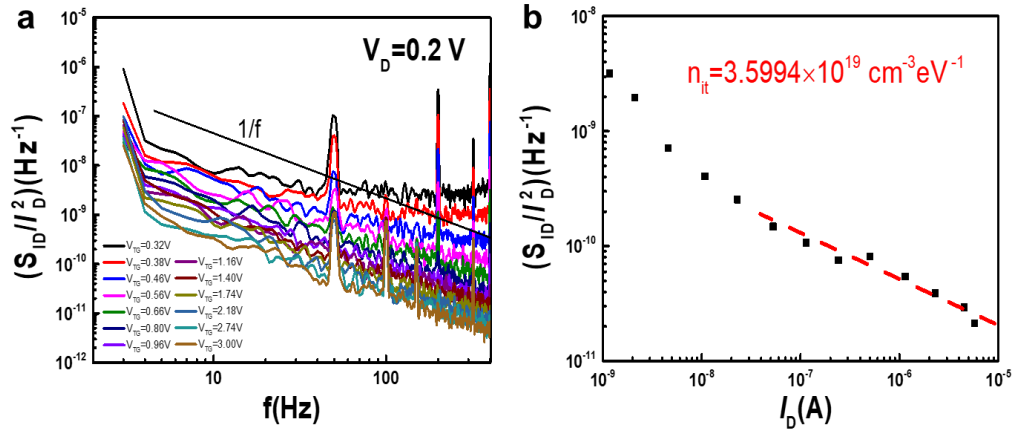

**Fig. S9.** Low frequency 1/f noise characteristics. **a**, Normalized noise power spectra ( $S_{ID}/I_D^2$ ) as a function of  $f$ . **b**,  $S_{ID}/I_D^2$  as a function of  $I_D$  at 100 Hz. The dashed line shows a corresponding linear fit.

In order to analyze the border trap intensity, the values of  $S_{ID}/I_D^2$  at 100 Hz are plotted as a function of  $I_D$  in Fig. S9b. The trap density  $N_{bt}$  can be extracted from the following equation:

$$\frac{S_{Id}}{I_d^2} = \frac{kT}{\gamma f W L} \left( \frac{1}{N} + \alpha \mu \right)^2 N_{bt} \quad (1)$$

where  $W$  is the channel width,  $L$  is the channel length,  $\mu$  is the mobility,  $T$  is

temperature,  $k$  is Boltzmann's constant,  $f = 100$  Hz, the tunneling coefficient  $\gamma$  is typically taken to be  $10^8 \text{ cm}^{-1}$ , the areal density of the carriers is  $qN = C_{ox}(V_{GS} - V_{th}) = \frac{I_D}{(W/L)\mu V_{DS}}$ , and  $\alpha$  is the scattering coefficient.

By fitting discrete points in Fig. S9b, the  $N_{bt}$  values in the accumulation regime were extracted using MATLAB and found to be  $3.5994 \times 10^{19} \text{ cm}^{-3} \text{ eV}^{-1}$ , which is lower than the value stated in previous reports<sup>3-5</sup>.

## 11. Analysis of inverters with different pull-up transistors

For circuit-level application, we need to increase the noise margin of the inverter. Based on the level-62 RPI model a simulation result is shown in Fig. S10a, where different  $V_T$  values are set for load transistor M1 to increase the driving current when  $V_G = 0$  V. Guided by the simulation results, metals with different work functions were used to prepare TG for pull-up transistor (M1) in the inverter circuit, Experimental results are shown in Fig. S10b, when Al is used as the top gate metal, the switching point of  $V_{TC}$  is 1.5 V and a largest noise margin can be obtained.

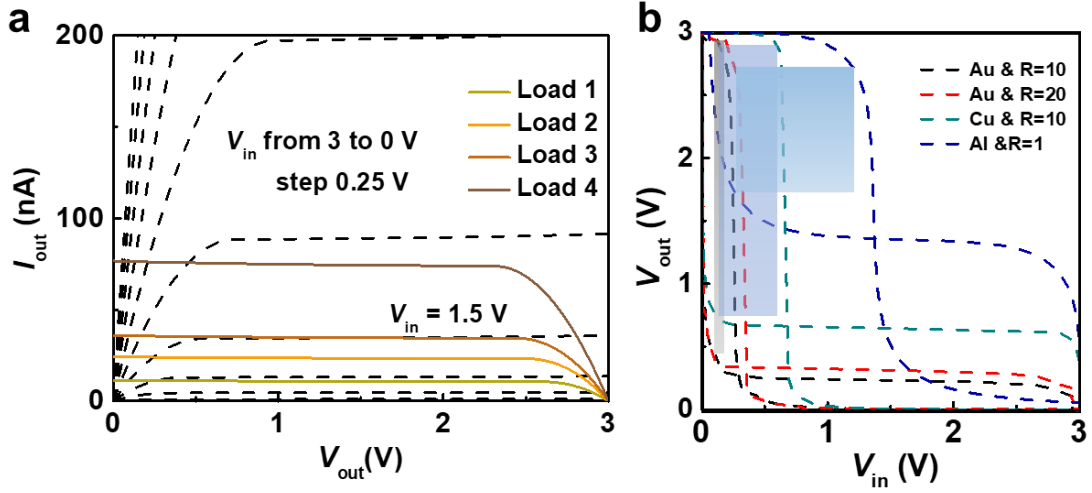

**Fig. S10.** **a**, Simulation results of output characteristics ( $I_{OUT}$  vs.  $V_{OUT}$ ) for pull-down transistor (M2) when  $V_{IN}$  is scanned from 0 V to 3 V in 0.25 V increments. The solid lines are the output characteristics of pull-up transistors with different  $V_T$ . **b**, Experimental voltage transfer characteristics with pull-up transistor designed by different TG metals and transistor geometry  $R=(W/L)_{M1}/(W/L)_{M2}$ .



## 12. Analog amplifier composed of an inverter based on MoS<sub>2</sub> FET

Thanks to its high voltage gain ( $>20$ ), the MoS<sub>2</sub> inverter is a promising analog amplifier for small AC signals. By applying an AC signal with a DC bias on the gate electrode of the driver FET, an amplified voltage can be obtained at the output port. To reach maximum output voltage swing, the DC bias value is carefully controlled to set the inverter in the middle of the steepest region of the voltage transfer curve. We achieved this by applying a 920 mV DC bias and mixing 20 mV AC signals on the gate bias. The frequency of the AC signal was set to be 0.1 Hz due to the limited sample rate of the measurement equipment. The input and output signals are displayed in Figure S11, where the output voltage ( $V_{out-amp}$ ) has a phase difference of  $180^\circ$  with respect to the input voltage ( $V_{in-amp}$ ). It is shown that the gain  $V_{in-amp}/V_{out-amp}$  is larger than 100, indicating the amplifier circuit has desired functionality. The frequency range can be further extended by reducing the parasitic capacitance in the overlap area and increasing the transistor's transconductance.

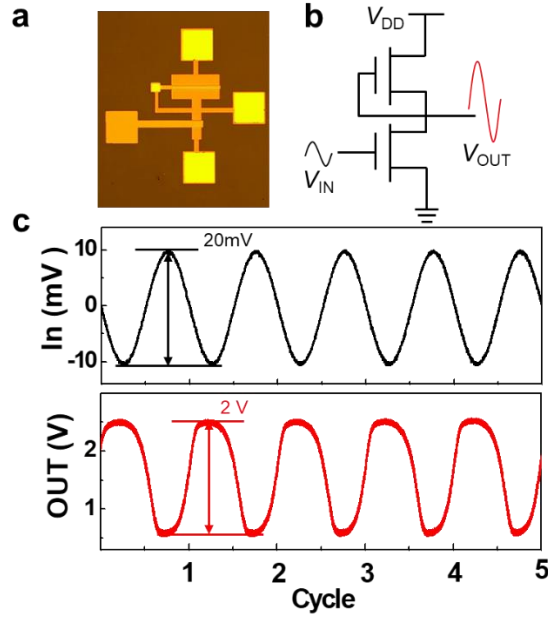

**Fig. S11.** **a**, Microscope image and **b**, schematic diagram of the inverter built from a pseudo n-type circuit. **c**, Measured waveforms from the inverter with 20 mV input and  $\sim 2$  V output indicate high gain ( $>100$ ).

### 13. Measurement results of various basic logic circuit units

In addition to the negative edge-triggered D flip-flop and 1-bit full-adder mentioned in the main text, we also prepared and tested a 1-stage inverter, 2-stage inverter, NAND, NOR, XNOR, XOR, LATCH, and 2-bit adder, as shown in Figs. S12 and S13.

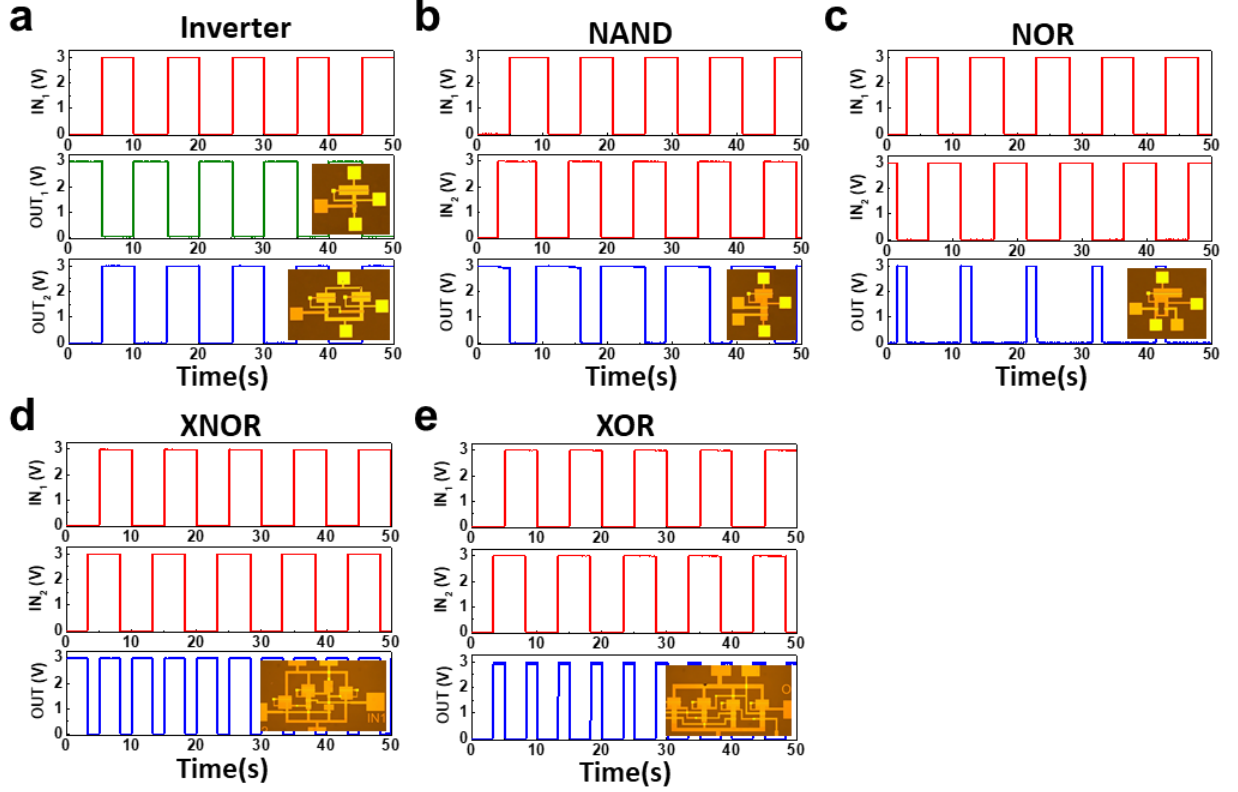

**Fig. S12.** Micrograph and measurements from the fabricated **a**, inverter, **b**, NAND, **c**, NOR, **d**, XNOR, and **e**, XOR.

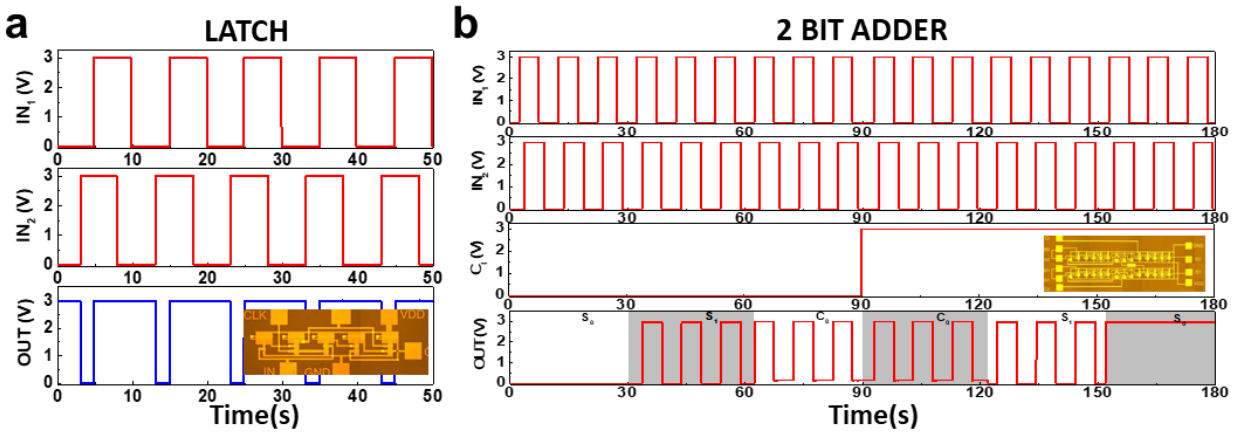

**Fig. S13.** Micrograph and measurement results from the fabricated **a**, LATCH and **b**, 2-bit adder.

## 14. Schematic diagram of DRAM testing setup

DRAM testing: A waveform generator was used to generate signals applied to the gate and drain bias of the DRAM transistor, as shown in Fig. S14a. The source was collected with an equivalent circuit, as shown in Fig. S14b.

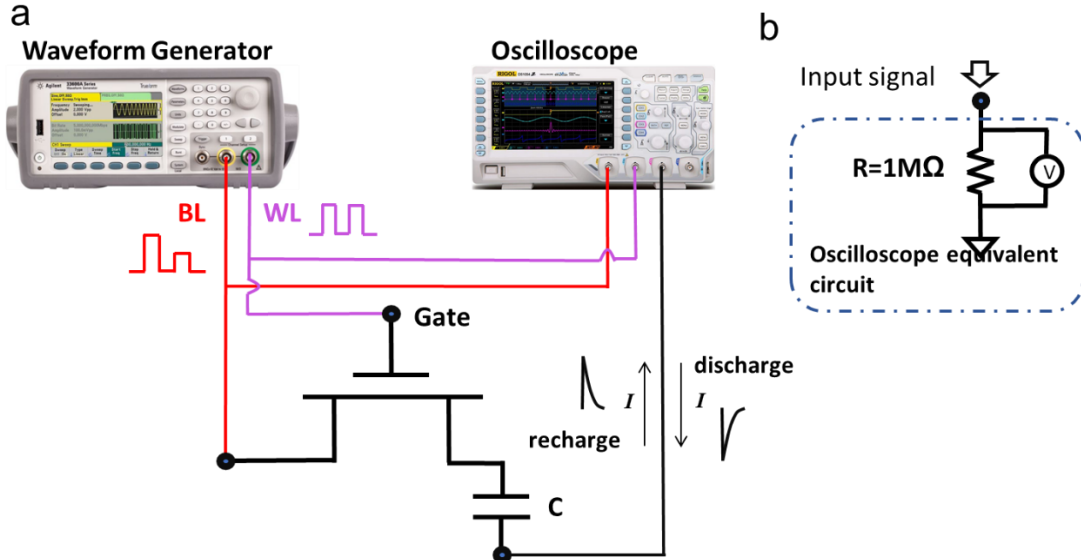

**Fig. S14.** **a**, Schematic diagram of DRAM testing equipment and **b**, equivalent oscilloscope circuit.

The characteristics of reading charge pulse after different hold time ranging from 10 to 8000 ms at the read operation are shown in Fig. S15. The reading charge pulse changes from negative to positive as the holding time increases, which means that the charge of DRAM is discharging with the hold time increasing.

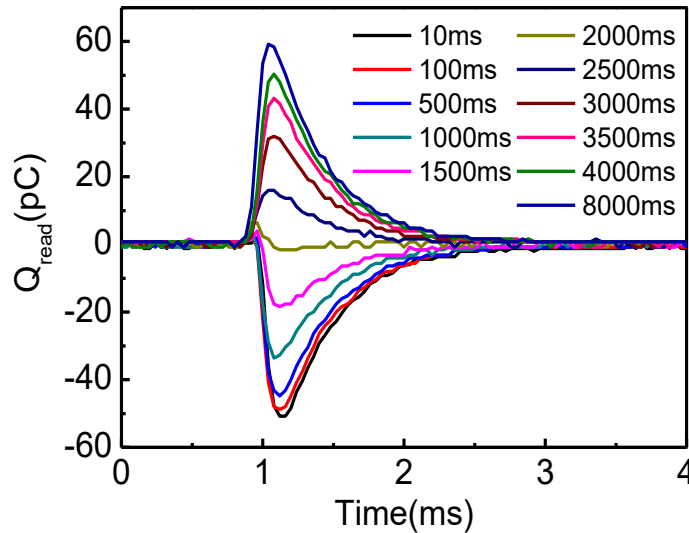

**Fig. S15.** The characteristics of reading charge pulse after different hold time at the read operation.

## 15. Photoelectric characteristics for top-gated MoS<sub>2</sub> FETs

In order to characterize the photoelectric characteristics of the top-gated MoS<sub>2</sub> FETs, we measured the transfer characteristics while the devices were illuminated with different wavelengths and power density values at  $V_{DS} = 1$  V. Further, the photocurrent can be extracted, as shown in Fig. S16. The responsivity spectra at different power density values were also calculated.

The time-resolved photoresponse in the top-gated MoS<sub>2</sub> phototransistor is shown in Fig. S17, where the data were gathered at  $V_{TG} = -1$  V and  $V_{DS} = 1$  V while illuminated with  $1.55 \text{ mW} \cdot \text{cm}^{-2}$  at 550 nm. A rise time of 1.2 s and fall time of 5.76 s were observed in the photocurrent measurements.

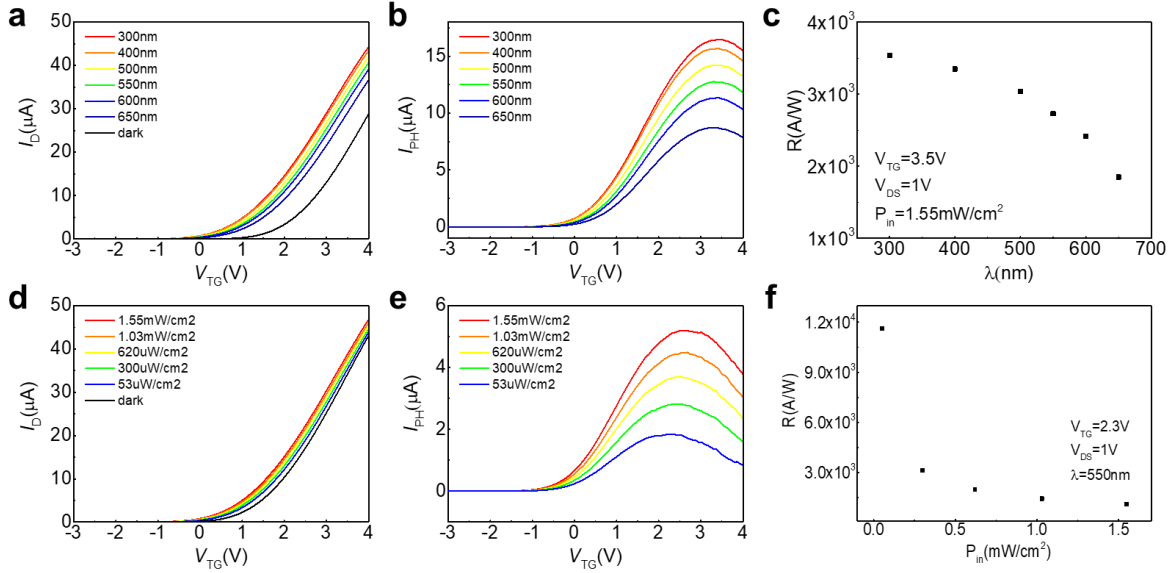

**Fig. S16.**  $I_D$ - $V_{TG}$  curves for a TG MoS<sub>2</sub> FET in darkness and while illuminated with **a**, different wavelengths and **d**, different  $P_{in}$  values at  $V_{DS} = 1$  V.  $I_{PH}$ - $V_{TG}$  curves for a top-gated MoS<sub>2</sub> FET illuminated with **b**, different wavelengths and **e**, different  $P_{in}$  values. **c**, Corresponding wavelength and **f**,  $P_{in}$  dependence of  $R$ .

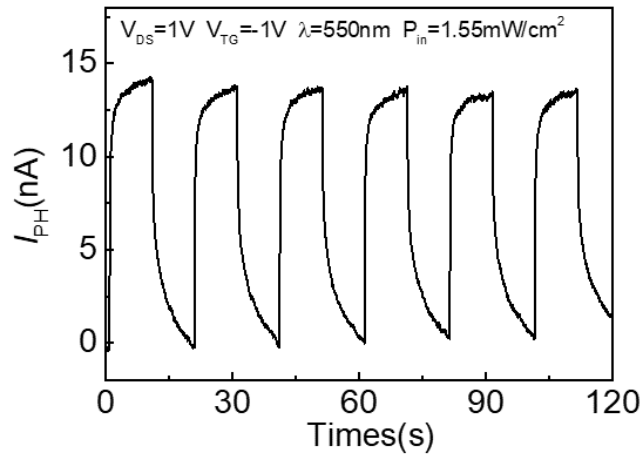

**Fig. S17.** Time-resolved photoresponse of the TG MoS<sub>2</sub> phototransistor with  $V_{TG} = -1$  V and  $V_{DS} = 1$  V under illumination with  $1.55 \text{ mW} \cdot \text{cm}^{-2}$  at 550 nm.

Detailed photocurrent characteristics from  $9 \times 9$  TG MoS<sub>2</sub> FET arrays mentioned in Fig. 3q are shown in Fig. S18 while illuminated with white light at  $V_{DS} = 0.5$  V.

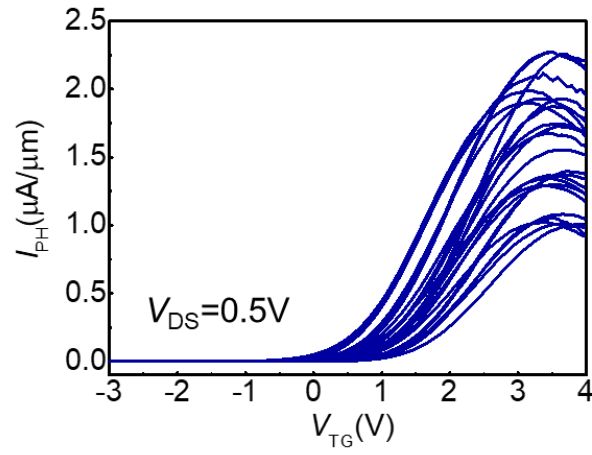

**Fig. S18.** Photocurrent characteristics of  $9 \times 9$  top-gated MoS<sub>2</sub> FET arrays shown in Fig. 3q.

## 16. Comparison with recently published works

Table S7 summarizes the results of the previously reported results and the work of this paper. Among these results our TG MoS<sub>2</sub> FETs exhibit high performance for almost all the important parameters, and the functional circuits in our work have the largest transistor number.

**Table S7.** Comparison of MoS<sub>2</sub> FET performance with recently published results

| Area               | V <sub>DS</sub><br>(V) | I <sub>on</sub> (A)   | I <sub>off</sub><br>(A) | I <sub>on</sub> /<br>I <sub>off</sub> | Mobility $\mu$<br>(cm <sup>2</sup> V <sup>-1</sup> s <sup>-1</sup> ) | V <sub>T</sub><br>(V) | Max. FETs<br>number/IC | W/L   | Gate<br>type | Ref              |
|--------------------|------------------------|-----------------------|-------------------------|---------------------------------------|----------------------------------------------------------------------|-----------------------|------------------------|-------|--------------|------------------|
| ~50mm <sup>2</sup> | 5                      | 9×10 <sup>-5</sup>    | 10 <sup>-12</sup>       | 10 <sup>8</sup>                       | ~3                                                                   | ~0.65                 | 115                    | 45/2  | BG           | 6                |
| 2mm×3mm            | 2                      | 2×10 <sup>-5</sup>    | 10 <sup>-11</sup>       | 10 <sup>6</sup>                       | 3                                                                    | -                     | 3                      | 45/3  | TG           | 7                |
| 4 inch             | 3                      | 10 <sup>-3</sup>      | 10 <sup>-13</sup>       | 10 <sup>10</sup>                      | ~55                                                                  | -                     | 12                     | 30/6  | BG           | 8                |
| -                  | 3                      | 10 <sup>-3</sup>      | 10 <sup>-13</sup>       | 10 <sup>10</sup>                      | ~50                                                                  | 0.54                  | 9                      | 30/4  | BG           | 9                |
| 1cm×0.5cm          | 1                      | ~10 <sup>-5</sup>     | 10 <sup>-14</sup>       | 10 <sup>8</sup>                       | > 40                                                                 | -2                    | 3                      | 1/1   | BG           | 10               |
| -                  | 1.5                    | 10 <sup>-5</sup>      | 10 <sup>-14</sup>       | 10 <sup>9</sup>                       | 80                                                                   | 2.41                  | 10                     | 30/4  | BG           | 11               |
| 2 inch             | 0.5                    | 5.65×10 <sup>-5</sup> | 10 <sup>-14</sup>       | 10 <sup>9</sup>                       | ~88                                                                  | 2.47                  | 156                    | 30/20 | TG           | <b>This work</b> |

## References:

- 1 Svetnik, V. *et al.* Random Forest: A Classification and Regression Tool for Compound Classification and QSAR Modeling. *Journal of Chemical Information and Computer Sciences* **43**, 1947-1958 (2003).
- 2 Archer, K. J. & Kimes, R. V. Empirical characterization of random forest variable importance measures. *Computational Stats & Data Analysis* **52**, 2249-2260 (2008).
- 3 Srinivasan, P., Olubuyide, O., Choi, Y. S. & Marshall, A. in *International Electron Devices Meeting*. 27.24.21-27.24.24.
- 4 Sangwan, V. K. *et al.* Low-Frequency Electronic Noise in Single-Layer MoS<sub>2</sub> Transistors. *Nano Letters* **13**, 4351-4355 (2013).
- 5 Xie, X. *et al.* Low-Frequency Noise in Bilayer MoS<sub>2</sub> Transistor. *ACS Nano* **8**, 5633-5640 (2014).
- 6 Wachter, S., Polyushkin, D. K., Bethge, O. & Mueller, T. A microprocessor based on a two-dimensional semiconductor. *Nature Communications* **8**, 14948 (2017).
- 7 Wang, L. *et al.* Electronic Devices and Circuits Based on Wafer-Scale Polycrystalline Monolayer MoS<sub>2</sub> by Chemical Vapor Deposition. *Advanced Electronic Materials* **5**, 1900393 (2019).
- 8 Li, N. *et al.* Large-scale flexible and transparent electronics based on monolayer molybdenum disulfide field-effect transistors. *Nature Electronics* (2020).
- 9 Yu, L. *et al.* in *International Electron Devices Meeting*. 32.33.31-32.33.34.
- 10 Wang, H. *et al.* in *International Electron Devices Meeting*. 4.6.1-4.6.4.
- 11 Yu, L. *et al.* Design, Modeling, and Fabrication of Chemical Vapor Deposition Grown MoS<sub>2</sub> Circuits with E-Mode FETs for Large-Area Electronics. *Nano Letters* **16**, 6349-6356 (2016).
